# Supplementary material for: Qualitative Study on Student Debt: Implications for Physical Therapists’ Professional and Personal Lives
Source: Research Square preprint supplement (doi:10.21203/rs.3.rs-6701681/v1), 2025-06-16
Supplement: Supplementary file 1 [file 2e0bbc4749b0c1542d4aaa8d.docx]

**PT Debt Research**

**Interview Questions**

1. Tell me about your student loan debt situation.
   1. Current amount
   2. Monthly payment
   3. Monthly income
   4. Types of loans
   5. Reasons for loans
   6. Decision making during loan acceptance
2. What is the most difficult aspect of having a high student loan debt obligation?
3. What is your current practice or plan to pay off your student debt?
4. What are your current feelings and thoughts about your student debt?
5. In what ways has your student loan debt affected your mental well-being, your financial well-being, and your plans for retirement? (physical well-being, emotional well-being, professional well-being)
   1. Follow-up: life plan changes (buying a house/car, getting married, having kids, etc.)
6. At what point in your education or professional career did you realize the real-life consequences of having high student debt?
   1. As best as you can recall, what school expenses (e.g., tuition, housing, books, travel) did you accurately anticipate, and which expenses if any, were a surprise to you after graduation?
7. To what degree did you feel comfortable with the loan process?
   1. What would have improved this?
8. As you can best recall, did the college counseling that you received (if any) before taking out your student loan adequately prepare you to manage your loans after graduation?
9. As you can best recall, how would you rate your financial management/planning knowledge before taking out student loans on a scale of 1 to 10, with 1 = I knew nothing at all to 10 – I considered myself an expert in financial management?
10. How engaged were your parents or a significant other in deciding whether to accept the various pieces of the aid offered?
    1. Financial literacy from parents? High school? Undergraduate?
    2. First-gen?
    3. Socioeconomic status? Did this effect you?
11. What advice do you have for students who need to take out student loans for their OT/PT program?
